# Supplementary material for: Balanced Codon Usage Optimizes Eukaryotic Translational Efficiency
Source: PubMed Central journal article supplement (PMC3315465; doi:10.1371/journal.pgen.1002603), 2012-03-29
Supplement: pgen.1002603.s003.pdf [file pgen.1002603.s003.pdf]

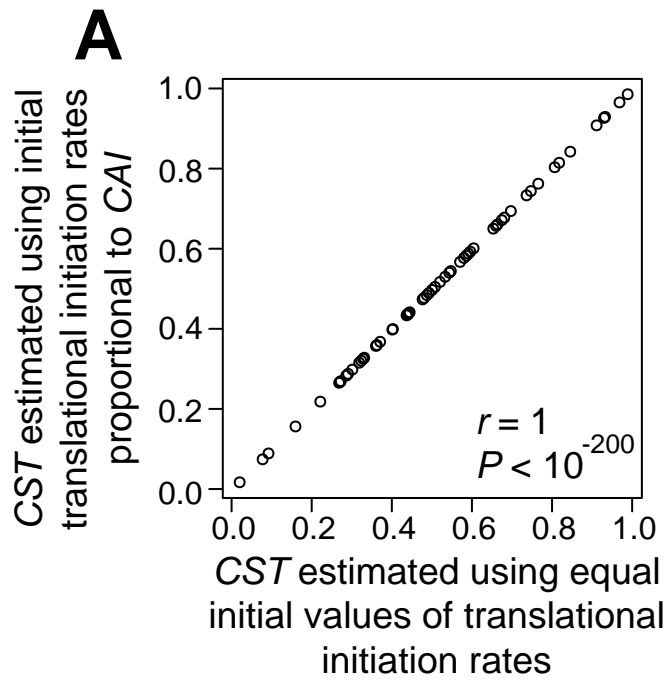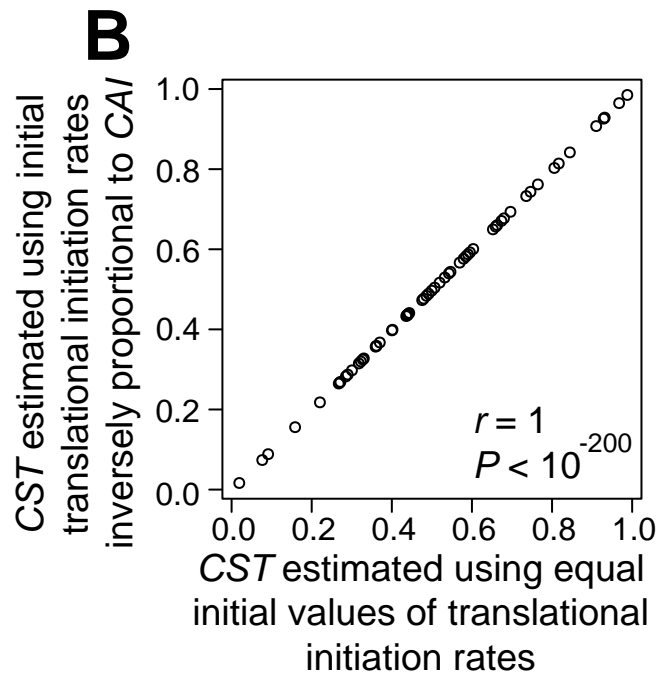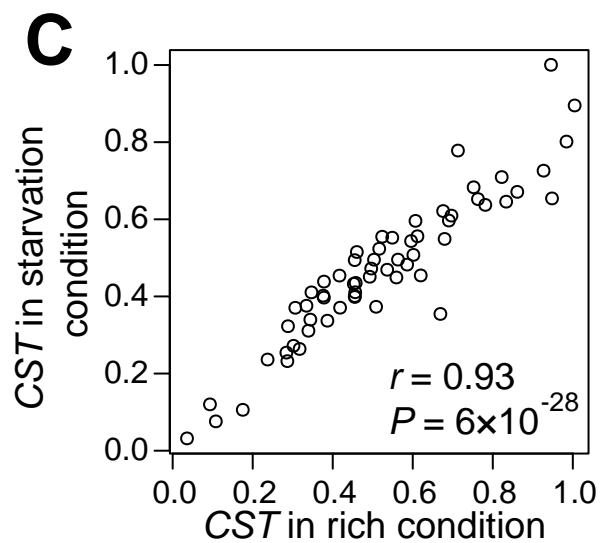

Figure S3
