# Supplementary material for: Balanced Codon Usage Optimizes Eukaryotic Translational Efficiency
Source: PubMed Central journal article supplement (PMC3315465; doi:10.1371/journal.pgen.1002603), 2012-03-29
Supplement: pgen.1002603.s013.pdf [file pgen.1002603.s013.pdf]

Table S1. Euclidian and Manhattan distances between the observed tRNA fractions and the predictions of the proportional rule, square rule, and truncation rule, respectively.

| Transcriptomes         | Euclidian distance ( $P$ value <sup>1</sup> ) |                              |                               | Manhattan distance ( $P$ value <sup>1</sup> ) |                              |                                |
|------------------------|-----------------------------------------------|------------------------------|-------------------------------|-----------------------------------------------|------------------------------|--------------------------------|
|                        | Proportional                                  | Square                       | Truncation                    | Proportional                                  | Square                       | Truncation                     |
| <i>S. cerevisiae</i>   | 0.42 ( $<1 \times 10^{-6}$ )                  | 0.90 ( $1 \times 10^{-6}$ )  | 1.45 ( $<1 \times 10^{-6}$ )  | 1.91 ( $<1 \times 10^{-6}$ )                  | 4.49 ( $1 \times 10^{-5}$ )  | 7.29 ( $<1 \times 10^{-6}$ )   |
| <i>S. pombe</i>        | 0.44 ( $<1 \times 10^{-6}$ )                  | 0.62 ( $<1 \times 10^{-6}$ ) | 1.56 ( $<1 \times 10^{-6}$ )  | 2.22 ( $<1 \times 10^{-6}$ )                  | 3.06 ( $<1 \times 10^{-6}$ ) | 7.66 ( $<1 \times 10^{-6}$ )   |
| <i>A. thaliana</i>     | 0.84 ( $<1 \times 10^{-6}$ )                  | 1.18 ( $<1 \times 10^{-6}$ ) | 2.23 ( $2.4 \times 10^{-5}$ ) | 3.55 ( $<1 \times 10^{-6}$ )                  | 4.68 ( $<1 \times 10^{-6}$ ) | 11.78 ( $1.2 \times 10^{-5}$ ) |
| <i>C. elegans</i>      | 0.49 ( $<1 \times 10^{-6}$ )                  | 0.71 ( $<1 \times 10^{-6}$ ) | 1.65 ( $2 \times 10^{-6}$ )   | 2.44 ( $<1 \times 10^{-6}$ )                  | 3.47 ( $<1 \times 10^{-6}$ ) | 8.41 ( $7 \times 10^{-6}$ )    |
| <i>D. melanogaster</i> | 0.43 ( $<1 \times 10^{-6}$ )                  | 0.66 ( $<1 \times 10^{-6}$ ) | 1.83 ( $<1 \times 10^{-6}$ )  | 1.95 ( $<1 \times 10^{-6}$ )                  | 3.25 ( $<1 \times 10^{-6}$ ) | 9.41 ( $<1 \times 10^{-6}$ )   |
| <i>M. musculus</i>     | 0.60 ( $<1 \times 10^{-6}$ )                  | 0.67 ( $<1 \times 10^{-6}$ ) | 2.20 ( $5 \times 10^{-5}$ )   | 2.83 ( $<1 \times 10^{-6}$ )                  | 3.12 ( $<1 \times 10^{-6}$ ) | 11.4 ( $5 \times 10^{-5}$ )    |
| <i>H. sapiens</i>      | 0.49 ( $<1 \times 10^{-6}$ )                  | 0.51 ( $<1 \times 10^{-6}$ ) | 2.03 ( $<1 \times 10^{-6}$ )  | 2.42 ( $<1 \times 10^{-6}$ )                  | 2.51 ( $<1 \times 10^{-6}$ ) | 10.27 ( $<1 \times 10^{-6}$ )  |

<sup>1</sup>  $P$  values indicate the probability that a distance generated by random tRNA pool is smaller than the observed distance, determined by  $10^6$  simulations.
