# Supplementary material for: Balanced Codon Usage Optimizes Eukaryotic Translational Efficiency
Source: PubMed Central journal article supplement (PMC3315465; doi:10.1371/journal.pgen.1002603), 2012-03-29
Supplement: pgen.1002603.s014.pdf [file pgen.1002603.s014.pdf]

Table S2. Unequal use of iso-synonymous codons in *S. cerevisiae*.

| Iso-synonymous codon groups <sup>1</sup> | Codon | tRNA | aa  | Perfect match <sup>2</sup> | Stability <sup>3</sup> | RSCU' |
|------------------------------------------|-------|------|-----|----------------------------|------------------------|-------|
| 1*                                       | GCT   | AGC  | Ala | 1                          | 1                      | 0.717 |
|                                          | GCC   | AGC  | Ala | 0                          | 0                      | 0.248 |
| 2*                                       | GCA   | TGC  | Ala | 1                          | 1                      | 0.030 |
|                                          | GCG   | TGC  | Ala | 0                          | 0                      | 0.005 |
| 3*                                       | CGT   | ACG  | Arg | 1                          | 1                      | 0.174 |
|                                          | CGC   | ACG  | Arg | 0                          | 0                      | 0.004 |
|                                          | CGA   | ACG  | Arg | 0                          | 1                      | 0.003 |
| 4*                                       | AAT   | GTT  | Asn | 0                          | 0                      | 0.147 |
|                                          | AAC   | GTT  | Asn | 1                          | 1                      | 0.853 |
| 5*                                       | GAT   | GTC  | Asp | 0                          | 1                      | 0.430 |
|                                          | GAC   | GTC  | Asp | 1                          | 1                      | 0.570 |
| 6*                                       | TGT   | GCA  | Cys | 0                          | 1                      | 0.868 |
|                                          | TGC   | GCA  | Cys | 1                          | 1                      | 0.132 |
| 7                                        | GGT   | GCC  | Gly | 0                          | 1                      | 0.929 |
|                                          | GGC   | GCC  | Gly | 1                          | 0                      | 0.047 |
| 8*                                       | CAT   | GTG  | His | 0                          | 1                      | 0.263 |
|                                          | CAC   | GTG  | His | 1                          | 1                      | 0.737 |
| 9                                        | ATT   | AAT  | Ile | 1                          | 0                      | 0.457 |
|                                          | ATC   | AAT  | Ile | 0                          | 1                      | 0.519 |
| 10*                                      | CTT   | GAG  | Leu | 0                          | 1                      | 0.026 |
|                                          | CTC   | GAG  | Leu | 1                          | 1                      | 0.005 |
| 11*                                      | CTA   | TAG  | Leu | 1                          | 1                      | 0.071 |
|                                          | CTG   | TAG  | Leu | 0                          | 1                      | 0.008 |
| 12*                                      | TTT   | GAA  | Phe | 0                          | 0                      | 0.194 |
|                                          | TTC   | GAA  | Phe | 1                          | 1                      | 0.806 |
| 13*                                      | CCT   | AGG  | Pro | 1                          | 1                      | 0.123 |
|                                          | CCC   | AGG  | Pro | 0                          | 0                      | 0.011 |
| 14*                                      | CCA   | TGG  | Pro | 1                          | 1                      | 0.857 |
|                                          | CCG   | TGG  | Pro | 0                          | 0                      | 0.009 |
| 15*                                      | TCT   | AGA  | Ser | 1                          | 1                      | 0.520 |
|                                          | TCC   | AGA  | Ser | 0                          | 1                      | 0.347 |
| 16*                                      | AGT   | GCT  | Ser | 0                          | 1                      | 0.041 |
|                                          | AGC   | GCT  | Ser | 1                          | 1                      | 0.027 |
| 17*                                      | ACT   | AGT  | Thr | 1                          | 1                      | 0.507 |
|                                          | ACC   | AGT  | Thr | 0                          | 1                      | 0.442 |
| 18*                                      | TAT   | GTA  | Tyr | 0                          | 0                      | 0.138 |
|                                          | TAC   | GTA  | Tyr | 1                          | 1                      | 0.862 |
| 19*                                      | GTT   | AAC  | Val | 1                          | 1                      | 0.549 |
|                                          | GTC   | AAC  | Val | 0                          | 1                      | 0.416 |

<sup>1</sup> Iso-synonymous codons are recognized by the same tRNA species. The perfect-match rule states that perfect codon-anticodon matches are favored over imperfect matches. The stability rule assumes that a codon-anticodon interaction is stable if the codon has either 1 or 2 G/C and is otherwise unstable (Rocha 2004 *Genome Res* **14**, 2279). This rule claims that codons with stable interactions with anticodons are preferred. We denote a star (correct prediction) or cross (incorrect prediction) for cases where the predictions of the two rules are compatible with each other.

<sup>2</sup> Perfect codon-anticodon matches are denoted by 1 and imperfect matches are denoted by 0.

<sup>3</sup> Stable codon-anticodon interactions are denoted by 1 and unstable interactions are denoted by 0.
